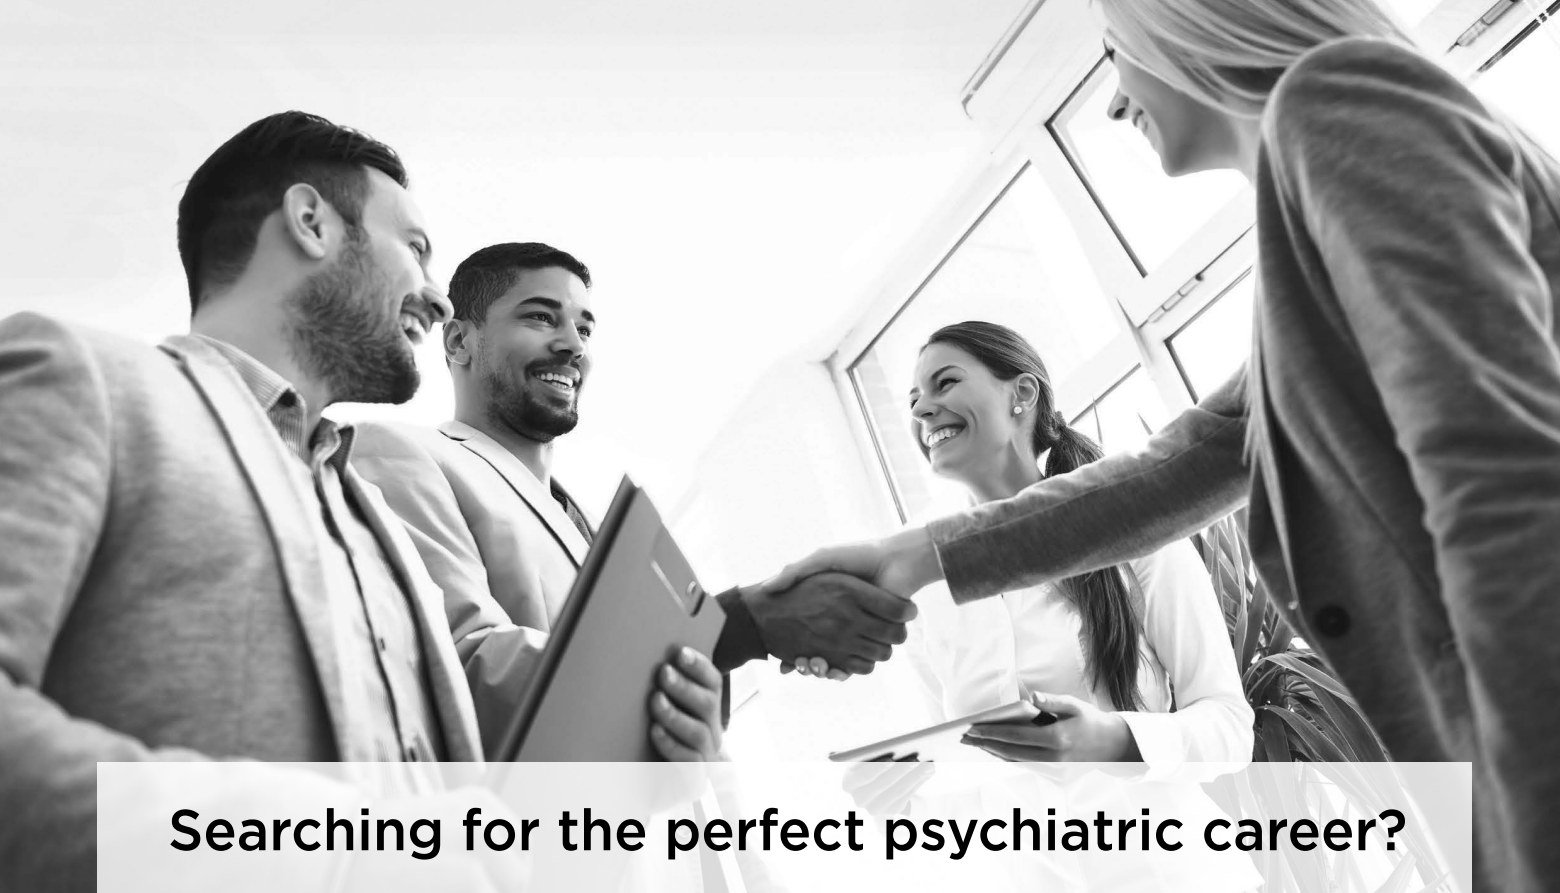

Searching for the perfect psychiatric career?

**Let APA JobCentral help!**

### Manage Your Career

- Browse hundreds of active job listings!
- Create an account to save jobs, store multiple resumes and cover letters and communicate with employers through our internal messaging system.
- Set up multiple job alerts specifying your skills, interests and location to receive e-mails when employers post jobs that match your criteria.

### Recruit for Open Positions

- Post your job in front of thousands of highly qualified psychiatrists.
- Cross promote your job listing in *Psychiatric News*.
- Search the anonymous resume database to find your ideal candidate.

AMERICAN  
PSYCHIATRIC  
ASSOCIATION

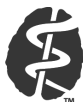

**JOBCENTRAL**  
The Career Hub for Psychiatry

**jobs.psychiatry.org**

## Correctional/Forensic Psychiatry Physician Opportunity in Denver, CO

The Department of Behavioral Health Services at Denver Health Medical Center is recruiting for a full-time psychiatrist to join our expanding Correctional/Forensic Psychiatry Service. The Behavioral Health department at Denver Health is an integral part of a Level I 525-licensed hospital, where medical and surgical services are readily available, with a mission of providing quality health care for all citizens of Denver regardless of ability to pay.

We seek a psychiatrist who enjoys working in a team-based and multi-disciplinary approach to deliver compassionate, evidence-based psychiatric care for persons experiencing mental health crises in the City and County Jails of Denver. Responsibilities include direct patient care, coordination NPs/PAs/psychologists/psychiatric nurses and social workers, and teaching of medical students, psychiatry residents, and forensic psychiatry fellows. The jails have a total population of 2300 inmates and all medical/psychiatric services are provided by Denver Health staff.

Applicants must be eligible for a Colorado medical license with Buprenorphine waived and be BE/BC in general adult psychiatry. Subspecialty training in forensic psychiatry/addiction psychiatry or addiction medicine is a plus but not required. Accepting applications from J1 and H1B visa candidates.

Interested applicants should send a CV to:  
[lawreen.mcbride@dhha.org](mailto:lawreen.mcbride@dhha.org)

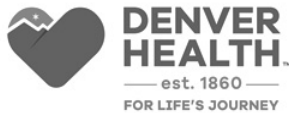

## Our Work Matters

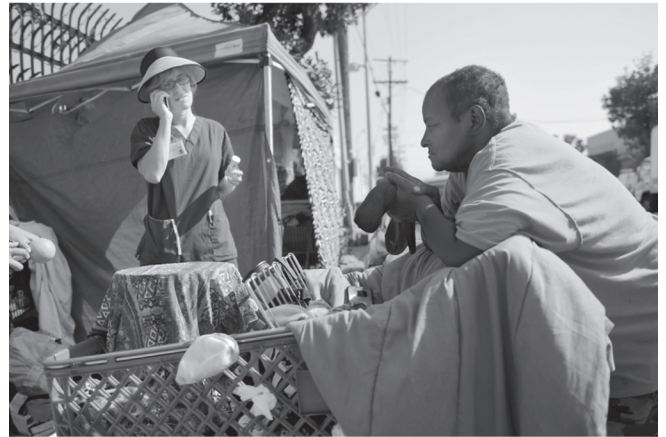

Join us and make a difference for  
those who need it the most.

Los Angeles County Department of Mental Health is a nationally recognized leader providing a wide range of services to one of the largest populations in the country. We invite you to join our team as we help the most vulnerable in our community find a path to independence and personal recovery.

Competitive salary **starting at \$233,784/yr** with **benefits/potential bonuses** up to \$30,000/yr and **24hrs/wk** for outside employment.

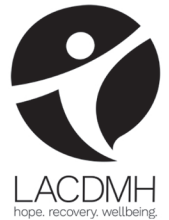

[www.psychiatristjobs.la](http://www.psychiatristjobs.la)

Visit [ps.psychiatryonline.org](http://ps.psychiatryonline.org) for these features!

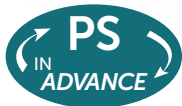

*New content is available in advance of print every 2 weeks!*

**The Michigan Peer-to-Peer Depression Awareness Program: School-Based Prevention to Address Depression Among Teens**

**State Adoption of Incentives to Promote Evidence-Based Practices in Behavioral Health Systems**

Psychiatric  
Services  
**FROM PAGES  
TO PRACTICE**

Listen to our podcast, **Psychiatric Services From Pages to Practice**, and learn about the latest mental health services research and why it is relevant.

**Episode 9:** A look at ECT use among privately insured U.S. adults; a randomized trial of peer-led self-management of general medical conditions for patients with serious mental illness; and racial, ethnic, and gender disparities in health care access and use among U.S. adults with serious psychological distress

Sign up (<http://appi.org/etocs>) to receive alerts as soon as new content is available.

AMERICAN  
PSYCHIATRIC  
ASSOCIATION  
PUBLISHING

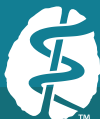

[ps.psychiatryonline.org](http://ps.psychiatryonline.org)

[www.appi.org](http://www.appi.org) • 1-800-368-5777 • e-mail: [appi@psych.org](mailto:appi@psych.org)

Keep up with the latest from *Psychiatric Services* on  
Facebook ([facebook.com/PsychiatryOnline](https://facebook.com/PsychiatryOnline)) and Twitter (@APAPubPsychSvcs).

# New and Essential Titles on Addiction Psychiatry

NEW!

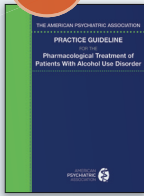

## The American Psychiatric Association Practice Guideline for the Pharmacological Treatment of Patients With Alcohol Use Disorder

American Psychiatric Association

2018 • 224 pages • ISBN 978-0-89042-682-1 • Paperback \$68.00 • Item #2682

2018 • 224 pages • ISBN 978-0-89042-683-8 • eBook \$54.00 • Item #2683

NEW!

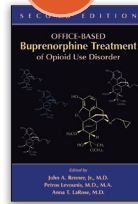

## Office-Based Buprenorphine Treatment of Opioid Use Disorder, Second Edition

Edited by John A. Renner, Jr., M.D., Petros Levounis, M.D., M.A., and Anna T. LaRose, M.D.

2018 • 395 pages • ISBN 978-1-61537-083-2 • Paperback \$79.00 • Item #37083

2018 • 395 pages • ISBN 978-1-61537-170-9 • eBook • \$63.00 • Item #37170

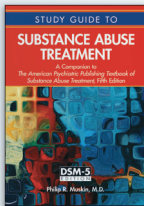

## Study Guide to Substance Abuse Treatment

DSM-5  
EDITION

*A Companion to The American Psychiatric Publishing Textbook of Substance Abuse Treatment, Fifth Edition*

Philip R. Muskin, M.D.

2016 • 419 pages • ISBN 978-1-58562-511-6 • Paperback \$61.00 • Item #62511

2016 • 419 pages • ISBN 978-1-61537-025-2 • eBook \$48.95 • Item #37025

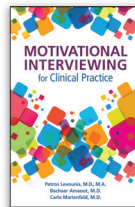

## Motivational Interviewing for Clinical Practice

Edited by Petros Levounis, M.D., M.A., Bachaar Arnaout, M.D., and Carla Marienfeld, M.D.

2017 • 286 pages • ISBN 978-1-61537-046-7 • Paperback \$65.00 • Item #37046

2017 • 286 pages • ISBN 978-1-61537-124-2 • eBook \$52.00 • Item #37124

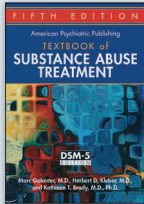

## The American Psychiatric Publishing Textbook of Substance Abuse Treatment, Fifth Edition

DSM-5  
EDITION

Edited by Marc Galanter, M.D., Herbert D. Kleber, M.D., and Kathleen T. Brady, M.D., Ph.D.

2015 • 980 pages • ISBN 978-1-58562-472-0 Hardcover • \$209.00 • Item #62472

2015 • 980 pages • ISBN 978-1-58562-518-5 eBook • \$167.00 • Item #62518

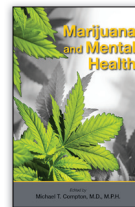

## Marijuana and Mental Health

Edited by Michael T. Compton, M.D., M.P.H.

2016 • 272 pages • ISBN 978-1-61537-008-5 • Paperback \$62.00 • Item #37008

2016 • 272 pages • ISBN 978-1-61537-065-8 • eBook \$49.95 • Item #37065

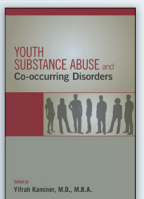

## Youth Substance Abuse and Co-occurring Disorders

Edited by Yifrah Kaminer, M.D., M.B.A.

2016 • 386 pages • ISBN 978-1-58562-497-3 Paperback • \$67.00 • Item #62497

2016 • 386 pages • ISBN 978-1-61537-022-1 eBook • \$54.00 • Item #37022

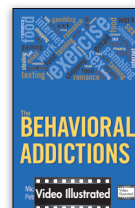

## The Behavioral Addictions

Edited by Michael S. Ascher, M.D., and Petros Levounis, M.D., M.A.

2015 • 235 pages • ISBN 978-1-58562-485-0 Paperback • \$64.00 • Item #62485

2015 • 235 pages • ISBN 978-1-58562-549-9 • eBook \$51.00 • Item #62549

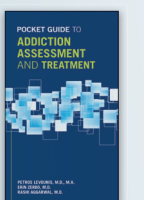

## Pocket Guide to Addiction Assessment and Treatment

Edited by Petros Levounis, M.D., M.A., Erin Zerbo, M.D., and Rashi Aggarwal, M.D.

2016 • 379 pages • ISBN 978-1-58562-512-3 • Paperback \$65.00 • Item #62512

2016 • 379 pages • ISBN 978-1-61537-072-6 • eBook \$52.00 • Item #37072

AMERICAN  
PSYCHIATRIC  
ASSOCIATION  
PUBLISHING

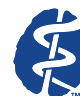

[www.appi.org](http://www.appi.org)

Email: [appi@psych.org](mailto:appi@psych.org)

Toll Free: 1-800-368-5777

20% Discount for American Psychiatric Association Members

25% Discount for APA Resident-Fellow Members

Please use Priority Code AH1735 when ordering.

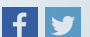

Source: http://ps.psychiatryonline.org/doi/suppl/10.1176/ps.2018.69.issue-3/suppl_file/back.pdf
