# Psychiatric Services

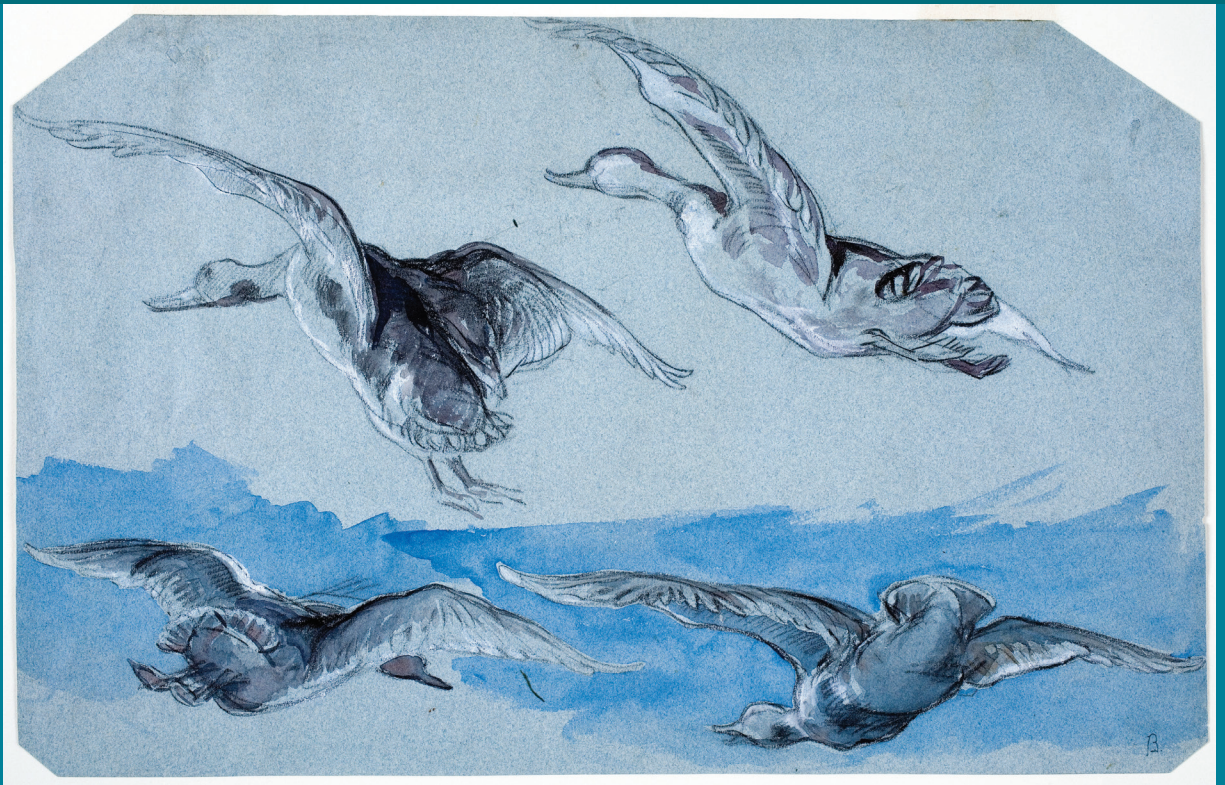

Person-oriented recovery for people with serious mental illness

Randomized trial of interventions for smoking cessation

Treatment utilization for PTSD in a national population

Urine testing for adherence to antipsychotics
