**JUST PUBLISHED!**

# Telepsychiatry and Health Technologies

## A Guide for Mental Health Professionals

Peter Yellowlees, MBBS, M.D., and Jay H. Shore, M.D., M.P.H.

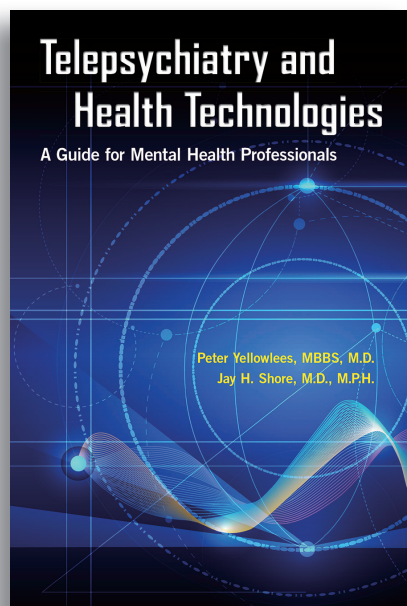

*Telepsychiatry and Health Technologies: A Guide for Mental Health Professionals* is a practical guide for psychiatrists and other mental health professionals seeking to exploit the enormous potential of today's innovative digital technologies to improve the quality, accessibility, and cost-effectiveness of care for patients with psychiatric disorders. Taking the doctor-patient relationship as its consistent focus, the book explores currently available mental health care delivery technologies—from telephony, smartphones, and apps to e-mail, secure texting, and videoconferencing—and offers practical advice to clinicians on how best to make use of these tools to provide high-quality care to their patients. Beginning with an overview of current psychiatric practice, the authors cover the broader context of telepsychiatry, including its history and evidence base; give specific guidance on setting up

and managing a telepsychiatry practice; and discuss in-person, online, and hybrid models of care, as well as data collection, electronic records, clinical documentation, and ethics.

Foremost a clinical manual, *Telepsychiatry and Health Technologies: A Guide for Mental Health Professionals* argues that the sensible use of health care technologies will reduce the current gap between mental health care supply and demand, improve models of care delivery, and ultimately lead to better health for more patients than traditional systems of care can provide.

2018 • 403 pages • ISBN 978-1-61537-085-6 • Paperback • \$69.00 • Item #37085

2018 • 403 pages • ISBN 978-1-61537-160-0 • eBook • \$55.00 • Item #37160

AMERICAN  
PSYCHIATRIC  
ASSOCIATION  
PUBLISHING

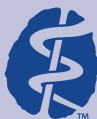

Order online @ [www.appi.org](http://www.appi.org)  
or Call Toll Free: 1-800-368-5777  
Email: [appi@psych.org](mailto:appi@psych.org)

20% Discount for American Psychiatric Association Members  
25% Discount for APA Resident-Fellow Members

Priority Code AH1806A

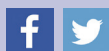

Source: https://psychiatryonline.org/doi/suppl/10.1176/ps.2018.69.issue-3/suppl_file/front.pdf
